# Supplementary material for: Factors Affecting Long-Term Compliance with Rigid Gas-Permeable Contact Lens Wear in Patients with Keratoconus
Source: MDPI journal article supplement (doi:10.3390/jcm11041091), 2022-02-18
Supplement: s1 [file s1]

Supplementary File S1

Questionnaire survey.

1. What is your name? \_\_\_\_\_
2. What is your date of birth? \_\_\_\_\_
3. What is your sex? \_\_\_\_\_
4. What is the city you are living in? \_\_\_\_\_
5. What is your occupation? Please choose between:
  - ☐ Auditor
  - ☐ Consultant
  - ☐ Management personnel
  - ☐ Administrative/Support staff
  - ☐ Technology/ Research staff
  - ☐ Teacher
  - ☐ Full-time student
  - ☐ HR staff
  - ☐ Production personnel
  - ☐ Marketing personnel/public relation practitioner
  - ☐ Civil personnel/ Clerk
  - ☐ Sales personnel
  - ☐ Professional(accountant, lawyer, architect, medical staff, journalist)
  - ☐ Others \_\_\_\_\_
6. What is your educational level?
  - ☐ Primary school
  - ☐ Middle school
  - ☐ High school

☐ College or above

7. When were you first diagnosed with keratoconus? \_\_\_\_\_

8. Which eyes are you diagnosed with keratoconus?

☐ The right eye

☐ The left eye

☐ Bilateral eyes

9. When did you first wear rigid gas permeable contact lens (RGPCL)? \_\_\_\_\_

10. Are you still wearing your RGPCL?

☐ Yes

☐ No

11. If the answer is NO, please answer:

1) When did you stop wearing RGPCL? \_\_\_\_\_

2) Why did you stop wearing RGPCL? \_\_\_\_\_

12. Do you have family members who were also diagnosed keratoconus?

☐ Yes

☐ No

13. If the answer is Yes, please answer:

1) How many family members were diagnosed keratoconus? \_\_\_\_\_

2) Relative 1: What is the relationship between you and her/him? \_\_\_\_\_

What is the age of your relative? \_\_\_\_\_

What is the gender of your relative? \_\_\_\_\_

3) Relative 2: What is the relationship between you and her/him? \_\_\_\_\_

What is the age of your relative? \_\_\_\_\_

What is the gender of your relative? \_\_\_\_\_

4) ...

14. Why did you choose RGPCL?

- ☐ To control the progression of KC
- ☐ To improve visual acuity
- ☐ Both

15. Do you agree with the statement that "I will give up RGPCL because of its high cost"?

- ☐ Strongly disagree
- ☐ Disagree
- ☐ Not sure
- ☐ Agree
- ☐ Strongly agree

16. Do you agree with the statement that "My visual acuity improved with RGPCL wear"?

- ☐ Strongly disagree
- ☐ Disagree
- ☐ Not sure
- ☐ Agree
- ☐ Strongly agree

17. Do you agree with the statement that "I am satisfied with RGPCL wear overall"?

- ☐ Strongly disagree
- ☐ Disagree
- ☐ Not sure
- ☐ Agree
- ☐ Strongly agree

18. Do you agree with the statement that "I am worried about the decentration or loss of

RGPCl when I am wearing RGPCl.”?

- ☐ Strongly disagree
- ☐ Disagree
- ☐ Not sure
- ☐ Agree
- ☐ Strongly agree

19. Do you agree with the statement that “My quality of life has improved due to the improvement of visual acuity with RGPCl wear”?

- ☐ Strongly disagree
- ☐ Disagree
- ☐ Not sure
- ☐ Agree
- ☐ Strongly agree

20. Do you agree with the statement that “I got used to the RGPCl within 2 weeks after the first commencement of lens wear”?

- ☐ Strongly disagree
- ☐ Disagree
- ☐ Not sure
- ☐ Agree
- ☐ Strongly agree

21. Do you agree with the statement that “Discomfort with RGPCl wear has negatively affected my need for it.”?

- ☐ Strongly disagree
- ☐ Disagree
- ☐ Not sure
- ☐ Agree
- ☐ Strongly agree

22. Do you agree with the statement that "I often experience discomfort such as eye redness or eye pain with RGPCL wear."?

- ☐ Strongly disagree
- ☐ Disagree
- ☐ Not sure
- ☐ Agree
- ☐ Strongly agree

23. Do you agree with the statement that "I am afraid that long-term wear of RGPCL will have side effects on my eyes. "?

- ☐ Strongly disagree
- ☐ Disagree
- ☐ Not sure
- ☐ Agree
- ☐ Strongly agree

24. In which treatment do you have better visual acuity?

- ☐ RGPCL
- ☐ Spectacle lenses
- ☐ No significant differences
- ☐ Not sure

25. Have you undergone corneal collagen cross-linking(CXL) surgery?

- ☐ No.
- ☐ Yes, but I didn't wear RGPCL before CXL.
- ☐ Yes, and I have already worn RGPCL before CXL.
